# Supplementary material for: Transcriptional regulation of adrenomedullin by oncostatin M in human astroglioma cells: Implications for tumor invasion and migration
Source: PubMed Central journal article supplement — Sci Rep. 2014 Sep 23;4:6444. doi: 10.1038/srep06444 (PMC4171698; doi:10.1038/srep06444), 2014-09-23
Supplement: srep06444-s1.pdf [file srep06444-s1.pdf]

## Supplementary Information

### **Transcriptional regulation of adrenomedullin by oncostatin M in human astrogloma cells: Implications for tumor invasion and migration**

Seul Ye Lim<sup>a,b</sup>, So-Hee Ahn<sup>a,b</sup>, Hyunju Park<sup>a,b</sup>, Jungsul Lee<sup>c</sup>, Kyungsun Choi<sup>c</sup>, Chulhee Choi<sup>c</sup>, Ji Ha Choi<sup>b,d</sup>, Eun-Mi Park<sup>b,d</sup>, Youn-Hee Choi<sup>a,b\*</sup>

<sup>a</sup>Department of Physiology, Global Top5 Research Program and <sup>b</sup>Tissue Injury Defense Research Center, School of Medicine, Ewha Womans University, Seoul, Korea; <sup>c</sup>Department of Bio and Brain Engineering, KAIST, Daejeon, Korea; <sup>d</sup>Department of Pharmacology, School of Medicine, Ewha Womans University, Seoul, Korea

**A. Figure 2A**

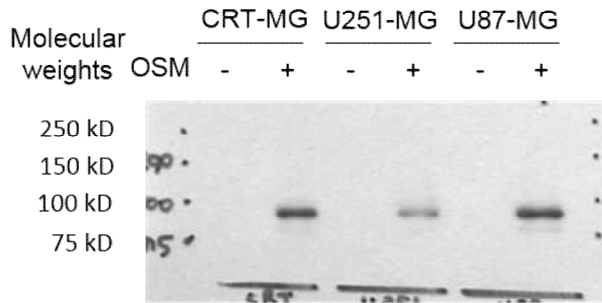

**B. Figure 2A**

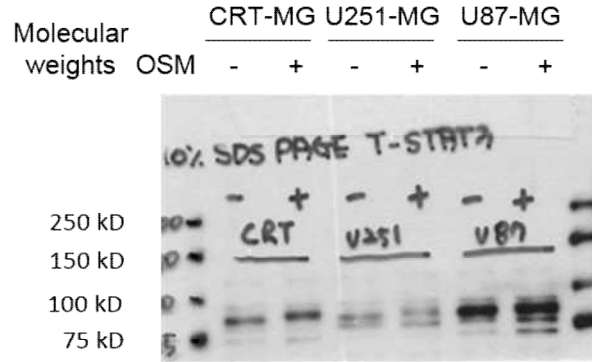

**C. Figure 2A**

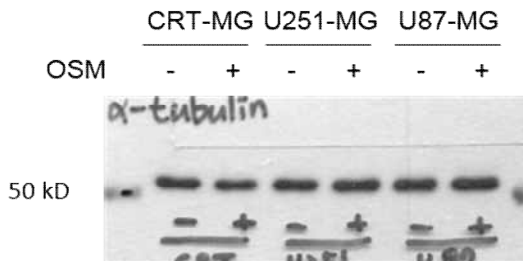

**D. Figure 2B**

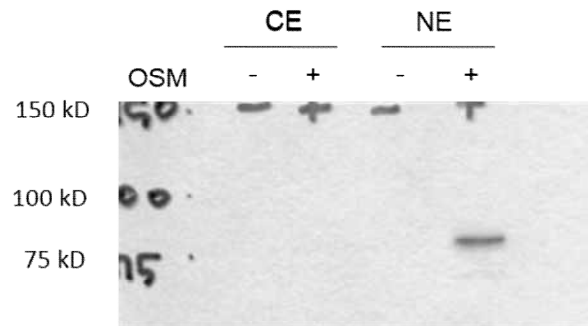

**E. Figure 2B**

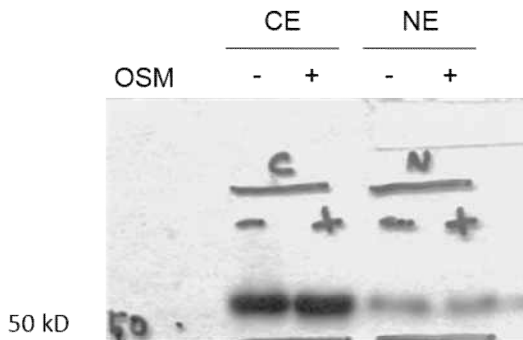

**F. Figure 2B**

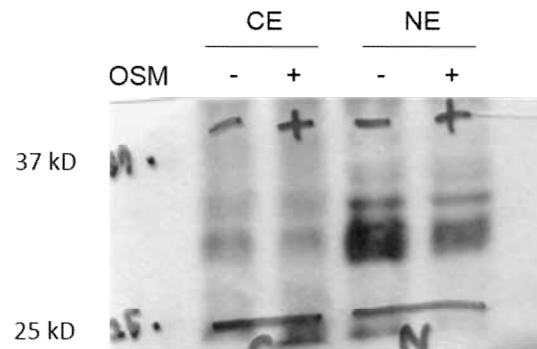

**G. Figure 4A**

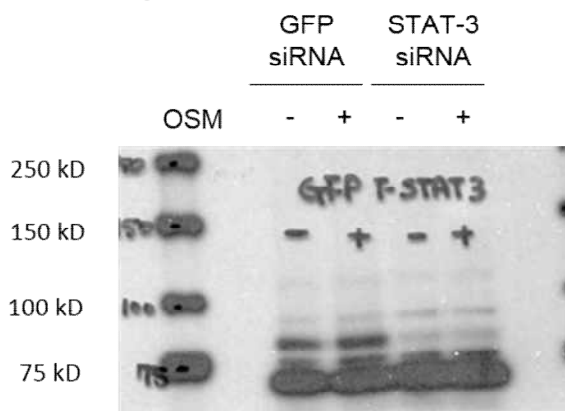

**H. Figure 4A**

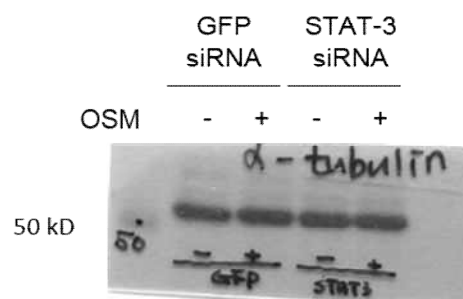

Supplementary Figure 1: Full-length images of the cropped blots presented in the main figures

A, B and C: Full-length images of Figures 2A show that OSM-induced STAT-3 activation and migration in astroglioma cells. Whole cell lysates from the CRT-MG, U251-MG and U87-MG cells treated with OSM (10 ng/mL) for 30 min were analyzed by immunoblotting against total STAT-3 and *p*-Y705-STAT-3. Tubulin was used as the loading control. OSM, oncostatin M.

D, E and F: Full-length images of Figures 2B show that nuclear and cytoplasmic extracts from CRT-MG cells treated with hOSM (10 ng/ml) for 30 min and analyzed by immunoblotting against total STAT-3 and *p*-Y705-STAT-3. Tubulin and Histone were used as loading and purify controls of each cellular fraction. P, phospho; CE, cytoplasmic extracts; NE, nuclear extracts.

G and H: Full-length images of Figures 2B show that STAT-3 knockdown reduces OSM-induced ADM expression in astroglioma cell lines. CRT-MG cells were transiently transfected with STAT-3 siRNA or GFP siRNA, as negative control. Two days after transfection, cells were incubated in the absence or presence of hOSM (10 ng/mL) for 24 h. Effective siRNA-mediated suppression of STAT-3 protein expression was verified for each assay by immunoblotting. GFP, green fluorescence protein.
